# Supplementary material for: Microfluidic diamagnetic water-in-water droplets: a biocompatible cell encapsulation and manipulation platform
Source: Royal Society of Chemistry journal article supplement (doi:10.1039/c8lc00867a), 2018-01-01
Supplement: c8lc00867a1.pdf [file c8lc00867a1.pdf]

## Supplementary Material

### Microfluidic diamagnetic water-in-water droplets: a biocompatible cell-encapsulation and manipulation platform

Maryam Navi,<sup>acd</sup> Niki Abbasi,<sup>bcd</sup> Morteza Jeyhani,<sup>bcd</sup> Vaskar Gnyawali,<sup>bcd</sup> and Scott S. H. Tsai <sup>\*abcd</sup>

<sup>a</sup> Graduate Program in Biomedical Engineering, Ryerson University, Toronto, Canada

<sup>b</sup> Department of Mechanical and Industrial Engineering, Ryerson University, Toronto, Canada

<sup>c</sup> Keenan Research Centre for Biomedical Science, St. Michael's Hospital, Toronto, Canada

<sup>d</sup> Institute for Biomedical engineering, Science and Technology (iBEST) – a partnership between Ryerson University and St. Michael's Hospital

#### Caption of the multimedia file

**Supplementary video 01** shows the separation of particle-encapsulating droplets from empty droplets when **(a)** the magnet is not present, and at three different magnet distances **(b)**  $y_m = 2.2$  mm, **(c)**  $y_m = 1.9$  mm, and **(d)**  $y_m = 1.4$  mm.

**Supplementary video 02** shows the separation of cell-encapsulating droplets from empty droplets when **(a)** the magnet is not present, and at three different magnet distances **(b)**  $y_m = 2.0$  mm, **(c)**  $y_m = 1.7$  mm, and **(d)**  $y_m = 1.3$  mm.
